# Supplementary material
Source: PubMed Central journal article supplement (PMC7434221)
Supplement: NIHMS932694-supplement-Supplementary_table_S6.pdf [file NIHMS932694-supplement-Supplementary_table_S6.pdf]

| Body                      | Alternative names/examples                                                                            | Localization           | Function                                                           | References |
|---------------------------|-------------------------------------------------------------------------------------------------------|------------------------|--------------------------------------------------------------------|------------|
| P-body                    | Processing body, GW body, decapping bodies                                                            | Cytoplasm              | mRNA decay, mRNA silencing                                         | 1          |
| U-body                    | Uridine-rich snRNP body                                                                               | Cytoplasm              | Storage/assembly of snRNPs                                         | 3          |
| Balbiani body             |                                                                                                       | Cytoplasm, germ cells  | Storage                                                            | 4,5        |
| Germ granules             | P-granule, nuage, chromatoid bodies, Balbiani body                                                    | Cytoplasm, germ cells  | Storage?                                                           | 6-8        |
| RNA transport granules    | neuronal RNA granule                                                                                  | Cytoplasm, neurons     | mRNA storage/transport                                             | 9          |
| Synaptic densities        | Postsynaptic densities                                                                                | Cytoplasm, neurons     | Neurotransmission                                                  | 10,11      |
| Stress granule            | NA                                                                                                    | Cytoplasm, upon stress | Translational regulation/mRNA storage                              | 1          |
| Nuclear pore complex      | NA                                                                                                    | Nuclear membrane       | Nuclear import/export                                              | 12         |
| Cajal body                | NA                                                                                                    | Nucleus                | Assembly and/or modification of splicing machinery                 | 13,14      |
| Cleavage body             | NA                                                                                                    | Nucleus                | mRNA processing                                                    | 15         |
| Gem                       | Gemini of Cajal bodies                                                                                | Nucleus                | Storage?; aid histone mRNA processing                              | 16,17      |
| Nuclear speckles          | splicing factor compartments (SF compartments), interchromatin granule clusters (IGCs), B snurposomes | Nucleus                | mRNA splicing                                                      | 18         |
| Nucleolus                 | NA                                                                                                    | Nucleus                | Ribosome biogenesis                                                | 19-21      |
| OPT domain                | NA                                                                                                    | Nucleus                | Transcriptional regulation                                         | 22,23      |
| PcG body                  | Polycomb group bodies                                                                                 | Nucleus                | Transcriptional repression                                         | 24         |
| Perinucleolar compartment | NA                                                                                                    | Nucleus                | Associated with malignancy                                         | 25         |
| PML bodies                | nuclear domain 10 (ND10), Kremer bodies, PML oncogenic domains                                        | Nucleus                | Transcriptional regulation; apoptosis signaling; antiviral defense | 26         |
| Histone locus body (HLB)  | NA                                                                                                    | Nucleus                | Histone mRNA biogenesis                                            | 14,27      |
| Paraspeckles              | NA                                                                                                    | Nucleus                | RNA processing?                                                    | 28,29      |
| Focal adhesions           | NA                                                                                                    | Plasma membrane        | Cell adhesion/migration                                            | 30         |
| Nephrin clusters          | NA                                                                                                    | Plasma membrane        | Glomerular filtration barrier                                      | 31-33      |
| TCR clusters              | NA                                                                                                    | Plasma membrane        | Immune synapse                                                     | 34,35      |
| Podosomes                 | NA                                                                                                    | Plasma membrane        | Cell adhesion/migration                                            | 36         |
| Actin patches             | NA                                                                                                    | Plasma membrane        | Endocytosis                                                        | 2          |

NA, not applicable

**Table: Various biomolecular condensates and their functions**

## References

1. Decker, C. J. & Parker, R. P-bodies and stress granules: possible roles in the control of translation and mRNA degradation. *Cold Spring Harb Perspect Biol* **4**, a012286 (2012).
2. Goode, B. L., Eskin, J. A. & Wendland, B. Actin and endocytosis in budding yeast. *Genetics* **199**, 315–358 (2015).
3. Liu, J.-L. & Gall, J. G. U bodies are cytoplasmic structures that contain uridine-rich small nuclear ribonucleoproteins and associate with P bodies. *Proc Natl Acad Sci USA* **104**, 11655–11659 (2007).
4. Marlow, F. L. *Maternal Control of Development in Vertebrates*. (Biota Publishing, 2010).
5. Boke, E. *et al.* Amyloid-like Self-Assembly of a Cellular Compartment. *Cell* **166**, 637–650 (2016).
6. Voronina, E., Seydoux, G., Sassone-Corsi, P. & Nagamori, I. RNA granules in germ cells. *Cold Spring Harb Perspect Biol* **3**, (2011).
7. Brangwynne, C. P. *et al.* Germline P granules are liquid droplets that localize by controlled dissolution/condensation. *Science* **324**, 1729–1732 (2009).
8. Saha, S. *et al.* Polar Positioning of Phase-Separated Liquid Compartments in Cells Regulated by an mRNA Competition Mechanism. *Cell* **166**, 1572–1584.e16 (2016).
9. Kiebler, M. A. & Bassell, G. J. Neuronal RNA granules: movers and makers. *Neuron* **51**, 685–690 (2006).
10. Sheng, M. & Kim, E. The postsynaptic organization of synapses. *Cold Spring Harb Perspect Biol* **3**, (2011).
11. Zeng, M. *et al.* Phase Transition in Postsynaptic Densities Underlies Formation of Synaptic Complexes and Synaptic Plasticity. *Cell* **166**, 1163–1175.e12 (2016).
12. Beck, M. & Hurt, E. The nuclear pore complex: understanding its function through structural insight. *Nat Rev Mol Cell Biol* (2016). doi:10.1038/nrm.2016.147
13. Handwerger, K. E., Cordero, J. A. & Gall, J. G. Cajal bodies, nucleoli, and speckles in the *Xenopus* oocyte nucleus have a low-density, sponge-like structure. *Mol Biol Cell* **16**, 202–211 (2005).
14. Nizami, Z., Deryusheva, S. & Gall, J. G. The Cajal body and histone locus body. *Cold Spring Harb Perspect Biol* **2**, a000653 (2010).
15. Li, L. *et al.* Dynamic nature of cleavage bodies and their spatial relationship to DDX1 bodies, Cajal bodies, and gems. *Mol Biol Cell* **17**, 1126–1140 (2006).
16. Morimoto, M. & Boerkoel, C. F. The role of nuclear bodies in gene expression and disease. *Biology (Basel)* **2**, 976–1033 (2013).
17. Cauchi, R. J. Gem formation upon constitutive Gemin3 overexpression in *Drosophila*. *Cell Biol. Int.* **35**, 1233–1238 (2011).
18. Spector, D. L. & Lamond, A. I. Nuclear speckles. *Cold Spring Harb Perspect Biol* **3**, (2011).
19. Boisvert, F.-M., van Koningsbruggen, S., Navascués, J. & Lamond, A. I. The multifunctional nucleolus. *Nat Rev Mol Cell Biol* **8**, 574–585 (2007).
20. Brangwynne, C. P., Mitchison, T. J. & Hyman, A. A. Active liquid-like behavior of nucleoli determines their size and shape in *Xenopus laevis* oocytes. *Proceedings of the National Academy of Sciences* **108**, 4334–4339 (2011).
21. Feric, M. *et al.* Coexisting Liquid Phases Underlie Nucleolar Subcompartments. *Cell* (2016). doi:10.1016/j.cell.2016.04.047
22. Spector, D. L. Nuclear domains. *J Cell Sci* **114**, 2891–2893 (2001).
23. Harrigan, J. A. *et al.* Replication stress induces 53BP1-containing OPT domains in G1 cells. *J Cell Biol* **193**, 97–108 (2011).
24. Pirrotta, V. & Li, H.-B. A view of nuclear Polycomb bodies. *Curr Opin Genet Dev* **22**, 101–109 (2012).
25. Pollock, C. & Huang, S. The perinucleolar compartment. *Cold Spring Harb Perspect Biol* **2**, a000679 (2010).
26. Lallemand-Breitenbach, V. & de Thé, H. PML nuclear bodies. *Cold Spring Harb Perspect Biol* **2**, a000661 (2010).
27. Duronio, R. J. & Marzluff, W. F. Coordinating cell cycle-regulated histone gene expression through assembly and function of the Histone Locus Body. *RNA Biol* **0** (2017). doi:10.1080/15476286.2016.1265198
28. Fox, A. H. & Lamond, A. I. Paraspeckles. *Cold Spring Harb Perspect Biol* **2**, a000687–a000687 (2010).
29. Hennig, S. *et al.* Prion-like domains in RNA binding proteins are essential for building subnuclear paraspeckles. *J Cell Biol* **210**, 529–539 (2015).
30. Case, L. B. & Waterman, C. M. Integration of actin dynamics and cell adhesion by a three-dimensional, mechanosensitive molecular clutch. *Nat Cell Biol* **17**, 955–963 (2015).
31. Jones, N. *et al.* Nck adaptor proteins link nephrin to the actin cytoskeleton of kidney podocytes. *Nature* **440**, 818–823 (2006).
32. Li, P. *et al.* Phase transitions in the assembly of multivalent signalling proteins. *Nature* **483**, 336–340 (2012).
33. Banjade, S. & Rosen, M. K. Phase transitions of multivalent proteins can promote clustering of membrane receptors. *Elife* **3**, (2014).
34. Dustin, M. L. & Groves, J. T. Receptor signaling clusters in the immune synapse. *Annu Rev Biophys* **41**, 543–556 (2012).
35. Su, X. *et al.* Phase separation of signaling molecules promotes T cell receptor signal transduction. *Science* (2016). doi:10.1126/science.aad9964
36. Calle, Y., Burns, S., Thrasher, A. J. & Jones, G. E. The leukocyte podosome. *Eur. J. Cell Biol.* **85**, 151–157 (2006).
